# Supplementary material for: LncRNA SNHG4 Modulates EMT Signal and Antitumor Effects in Endometrial Cancer through Transcription Factor SP-1
Source: MDPI journal article supplement (doi:10.3390/biomedicines11041018), 2023-03-27

Table S1. Target siRNA sequences

| NO | siRNA   | Sequence  |                           | Molecular weight |
|----|---------|-----------|---------------------------|------------------|
| 1  | SNHG4_1 | Sense     | CAUCCUUCACCCAUCUGAAUU     | 6178             |
|    |         | Antisense | UUCAGAUAGGGUGAAGGAUGUU    | 6458.2           |
| 2  | SNHG4_2 | Sense     | CAUCUGAAGGGAGGAAAUAUU     | 6448.2           |
|    |         | Antisense | UAUUUCCUCCCUUCAGAUGUU     | 6173             |
| 3  | SNHG4_3 | Sense     | GUCUUCUUGUCAUGUAGGUUU     | 6270             |
|    |         | Antisense | ACCUACAUGACAAGAAGACUU     | 6351.2           |
| 4  | SNHG4_4 | Sense     | GUCAUGUAGGUCCCAAUAUU      | 6299.1           |
|    |         | Antisense | UAAUUGGGACCUACAUGACUU     | 6322.1           |
| 5  | SNHG4_5 | Sense     | CAAUCUCGGCUCACUACAAUU     | 6241.1           |
|    |         | Antisense | UUGUAGUGAGCCGAGAUUGUU     | 6395.2           |
| 6  | SP-1_1  | Sense     | GCCUAAUAUUCAGUAUCAUU      | 6267.1           |
|    |         | Antisense | UUGAUACUGAAUAUUAGGCUU     | 6324.1           |
| 7  | SP-1_2  | Sense     | GGUCAAUAACAGAUCAUACUU     | 6329.2           |
|    |         | Antisense | GUAUGAUCUGUAUUUGACCUU     | 6277.1           |
| 8  | SP-1_3  | Sense     | CAAUAGCUACUCAACUACUUU     | 6226.1           |
|    |         | Antisense | AGUAGUUGAGUAGCUAUUGUU     | 6380.2           |
| 9  | SP-1_4  | Sense     | GCAACAUGGGAAUUAUGAAUU     | 6409.2           |
|    |         | Antisense | UUCAUAAUUCCTCAUGUUGCUU    | 6197             |
| 10 | SP-1_5  | Sense     | CCCUUAUUACCACCAUAUUU      | 6163             |
|    |         | Antisense | AUAUUGGUGGUAAUAAGGGUU     | 6443.2           |
| 11 | Control | Sense     | CCUCGUGCCGUUCCAUCAGGUAGUU | 7487.7           |
|    |         | Antisense | CUACCUGAUGGAACGGCACGAGGUU | 7636.9           |

Table S2. Real-time PCR target primer sequences

|                  |         | sequence 5' - 3'      |
|------------------|---------|-----------------------|
| E-cadherin       | Forward | ATTCTGATTCTGCTGCTCTTG |
|                  | Reverse | AGTAGTCATAGTCCTGGTCCT |
| N-cadherin       | Forward | CCCAAGACAAAGAGACCCAG  |
|                  | Reverse | GCCACTGTGCTTACTGAATTG |
| $\beta$ -catenin | Forward | TGCAGTTCGCCTTCACTATG  |
|                  | Reverse | ACTAGTCGTGGAATGGCACC  |
| Wnt5 $\beta$     | Forward | TGTGAGGTGAAGACCTGCTG  |
|                  | Reverse | AAAGTTGGGGGAGTTCTCGT  |
| SNHG4            | Forward | GCAGGTGACAGTCTGCATGT  |
|                  | Reverse | AAGAAGCTGTCATGGCCAAC  |
| SP-1             | Forward | CTGGTGGGCAGTATGTTGTG  |
|                  | Reverse | TTGGTTTGCACCTGGTATGA  |

**Table S3.** Clinicopathologic factors in benign Endometrial serum and Endometrial cancer serum samples.

| Factor                      | n (%) | Low        | High        | P-value <sup>a</sup> |
|-----------------------------|-------|------------|-------------|----------------------|
| Age (mean±SD)               | 100   | 51.14±8.86 | 53.64±10.45 | 0.553                |
| Cell type                   |       |            |             |                      |
| Type I                      |       |            |             |                      |
| Endometrioid adenocarcinoma | 100   | 27         | 73          | 0.00001              |
| Stage                       |       |            |             | 0.855                |
| I                           | 64    | 18         | 46          |                      |
| II                          | 9     | 2          | 7           |                      |
| III                         | 22    | 5          | 16          |                      |
| IV                          | 5     | 2          | 3           |                      |
| Grade                       |       |            |             | 0.284                |
| I                           | 47    | 14         | 33          |                      |
| II                          | 30    | 5          | 25          |                      |
| III                         | 23    | 8          | 15          |                      |
| Lymphnode metastasis        |       |            |             | 0.711                |
| Yes                         | 21    | 5          | 16          |                      |
| No                          | 79    | 22         | 57          |                      |
| Lymphatic invasion          |       |            |             | 0.202                |
| Yes                         | 32    | 6          | 26          |                      |
| No                          | 68    | 21         | 47          |                      |
| Tumor size                  |       |            |             | 0.776                |
| <2cm                        | 32    | 10         | 22          |                      |
| 2_4                         | 38    | 10         | 28          |                      |
| ≥4cm                        | 30    | 7          | 23          |                      |
| Recur                       |       |            |             | 0.886                |
| Yes                         | 14    | 4          | 10          |                      |
| No                          | 86    | 23         | 63          |                      |
| BMI                         |       |            |             | 0.729                |
| 25>                         | 49    | 25         | 35          |                      |
| 25<                         | 51    | 13         | 38          |                      |

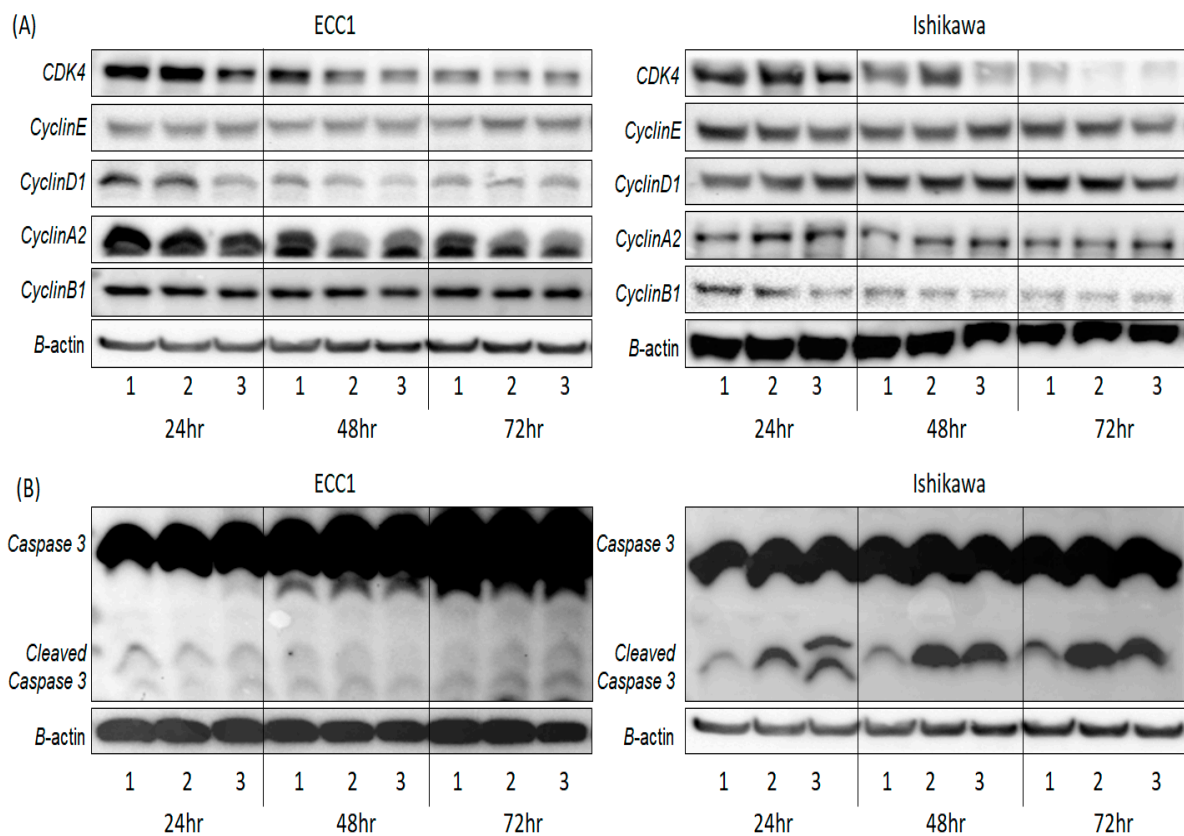

Figure S1. Western blot analysis of cell cycle regulatory marker(A) and apoptosis marker(B) following siSNHG4 treatment of endometrial cancer cells. 1: control 2: siSNHG4\_3 3: siSNHG4\_4

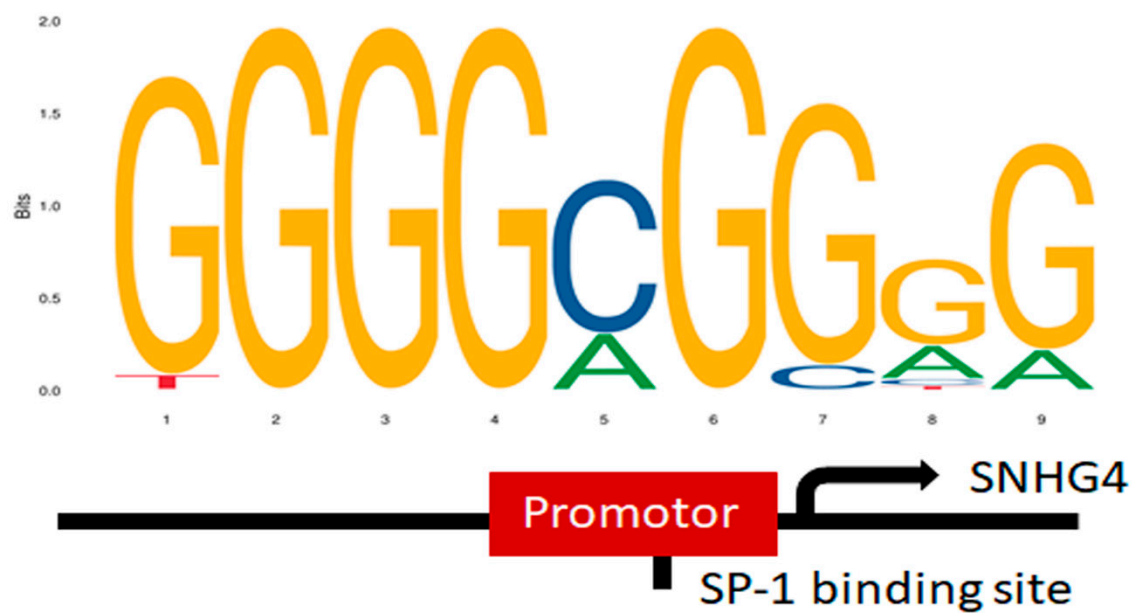

Figure S2. SP-1 binding site using JASPAR database.

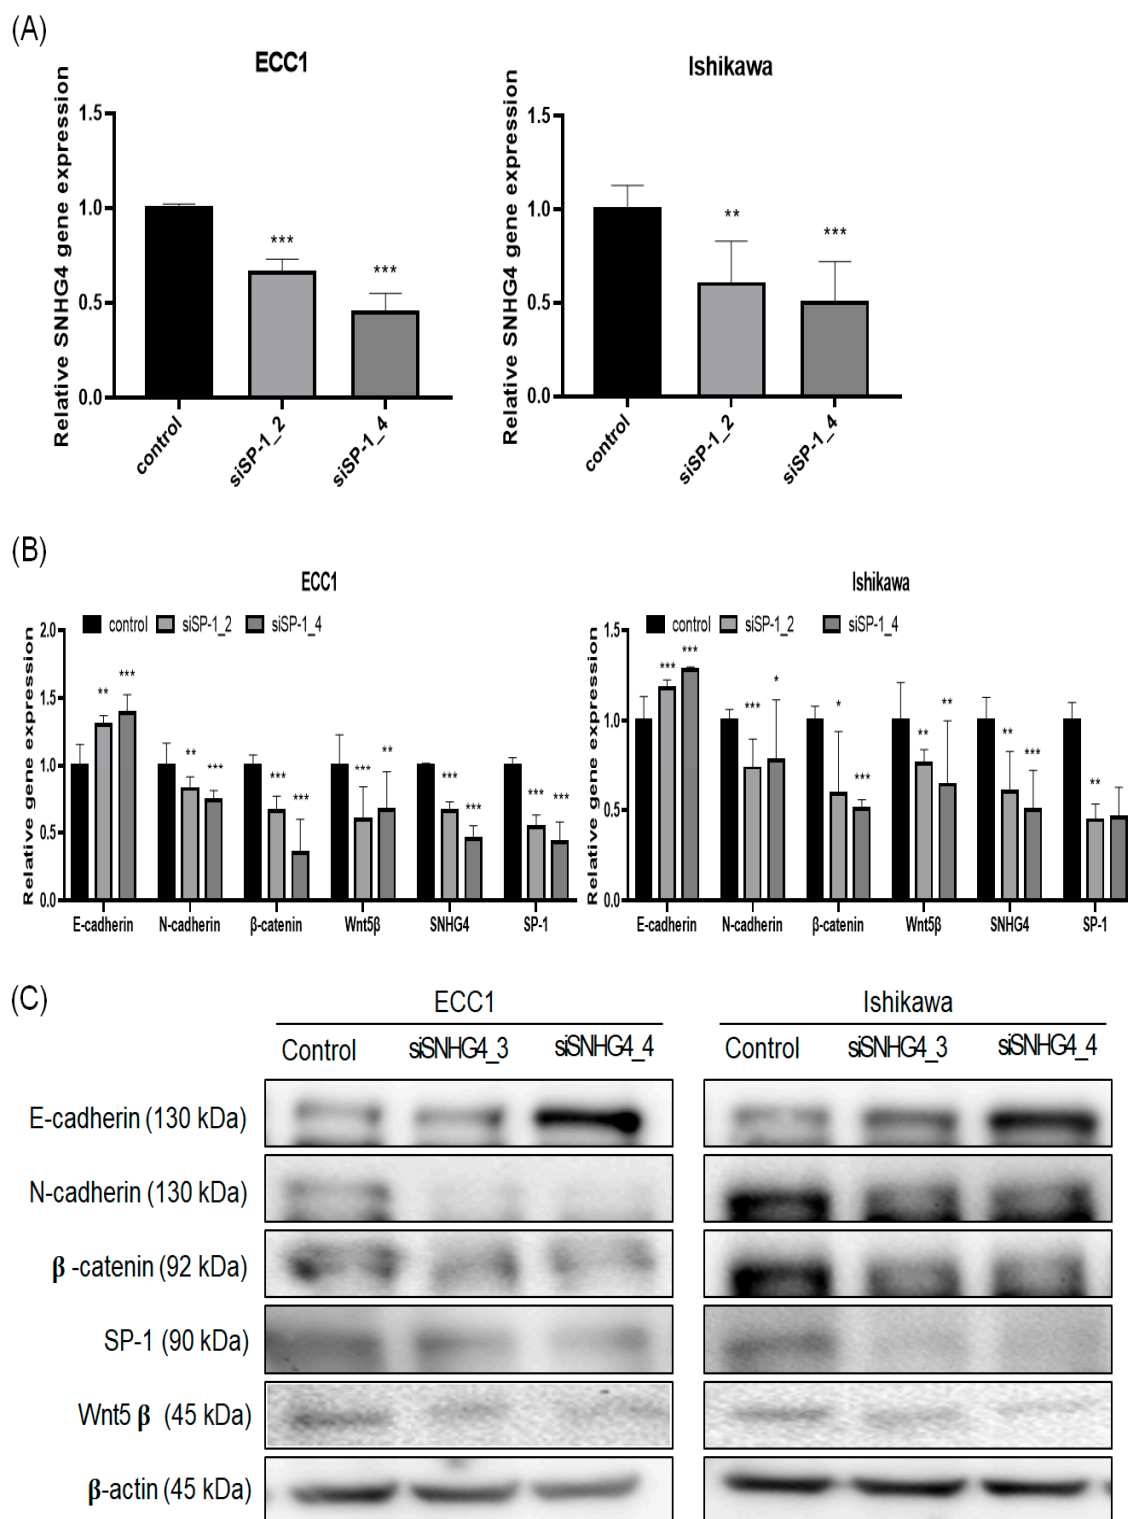

Figure S3. SP-1 regulates EMT signaling pathways. (A) SP-1 was knocked down in two endometrial cancer cell lines. (B) EMT expression were determined through quantitative real-time polymerase chain reaction (qRT-PCR) analysis. qRT-PCR was performed in triplicate. \*  $p < 0.05$ , \*\*  $p < 0.01$ , \*\*\*  $p < 0.001$  versus control. (C) EMT expression of protein lysates of two endometrial cancer cell lines in which SP-1 was knocked down was confirmed by Western blot analysis.

Figure S4. The whole Western blot for Figure 3.

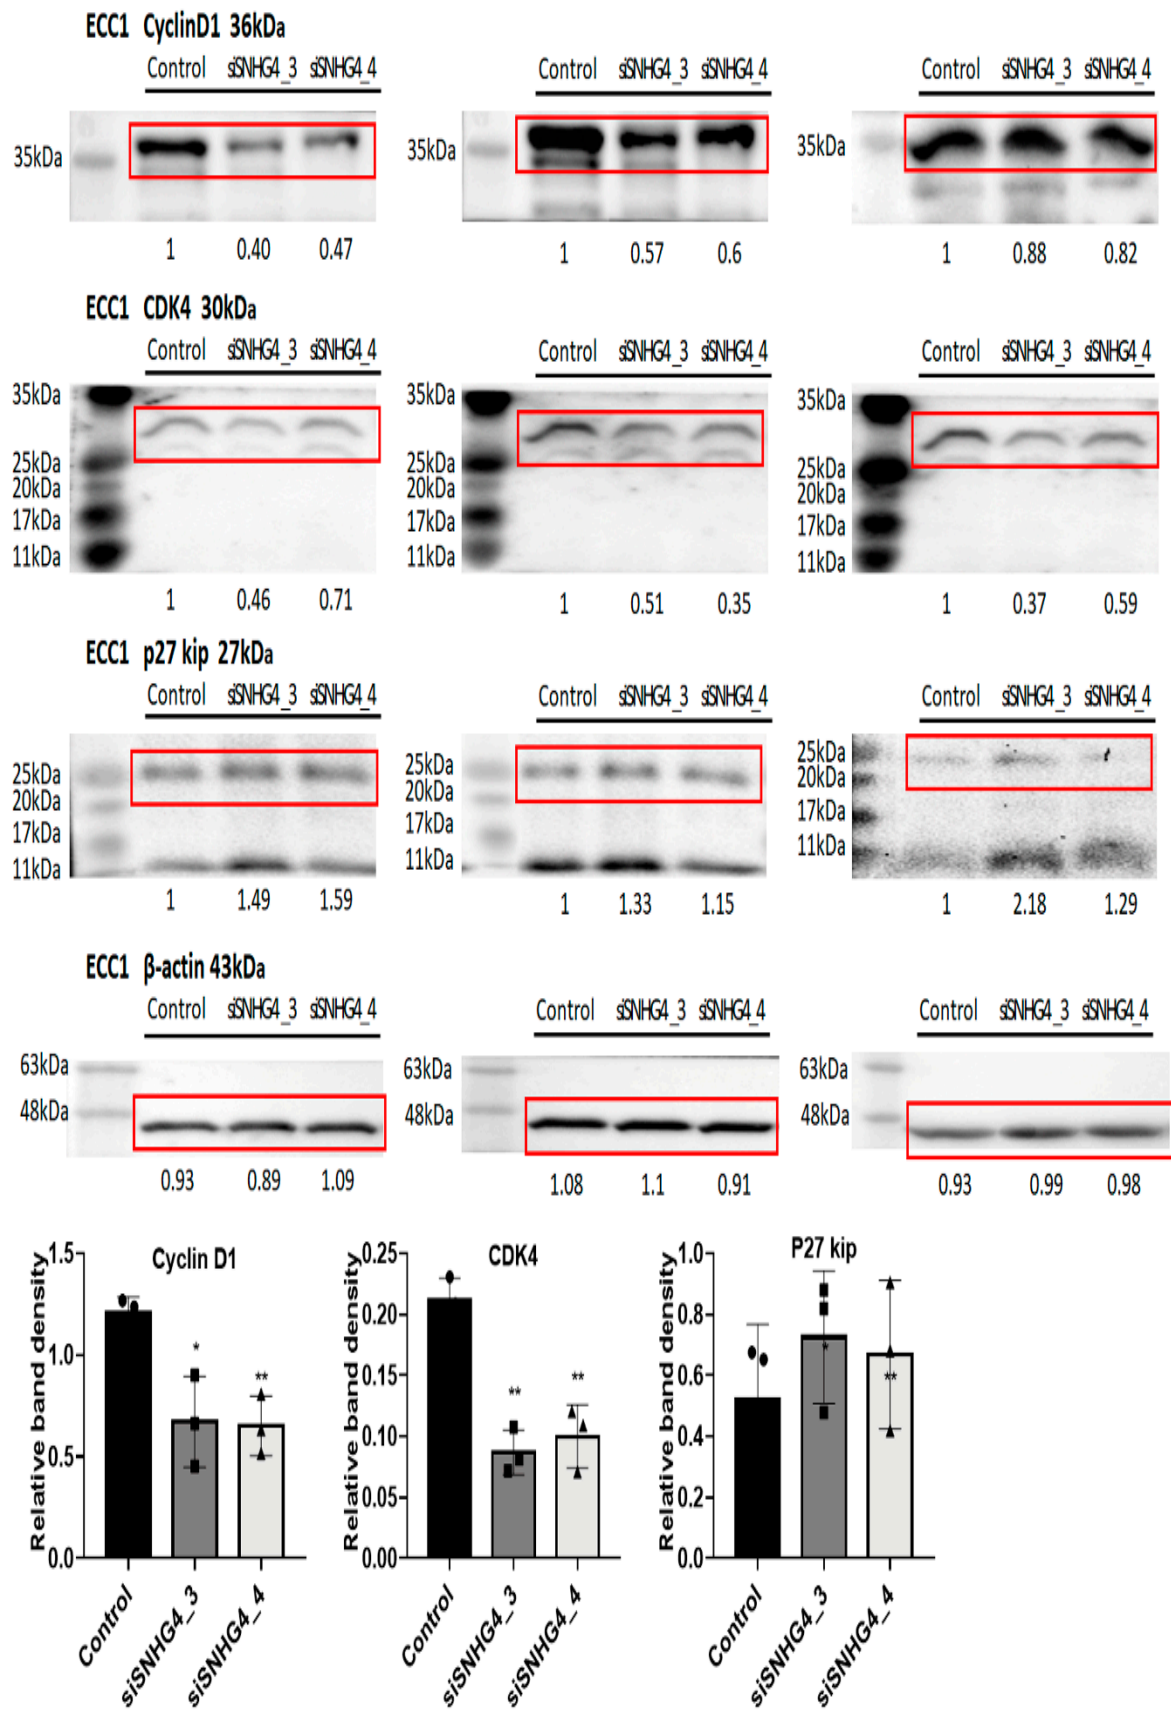

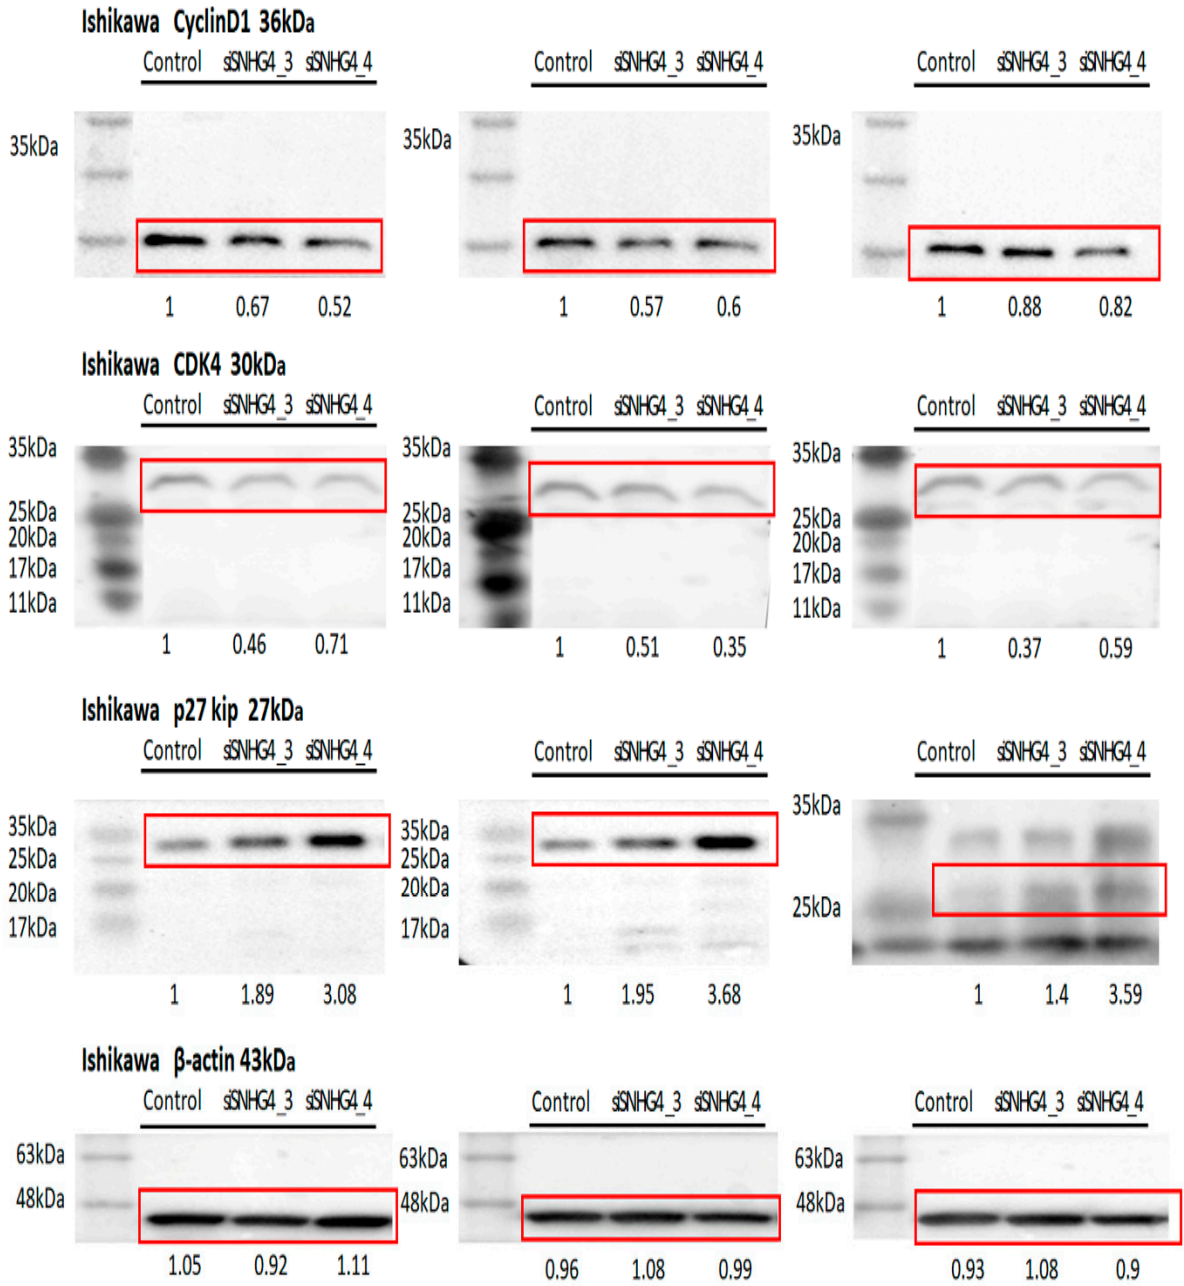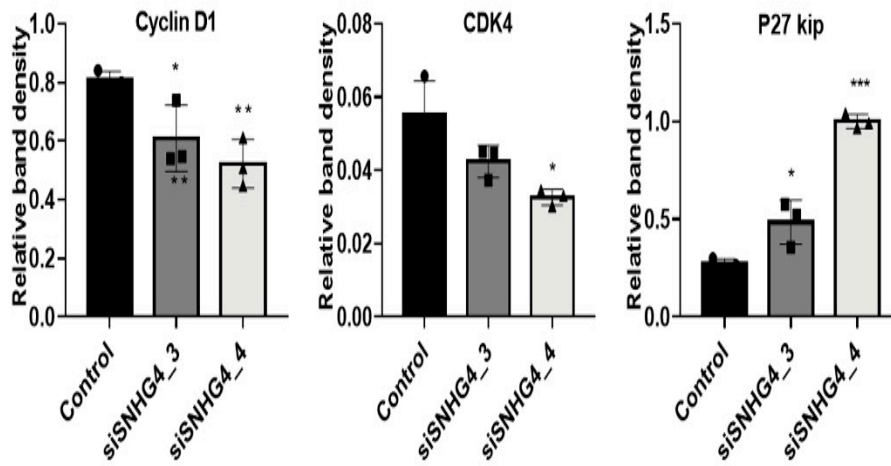



Figure S5. The whole Western blot for Figure 5.

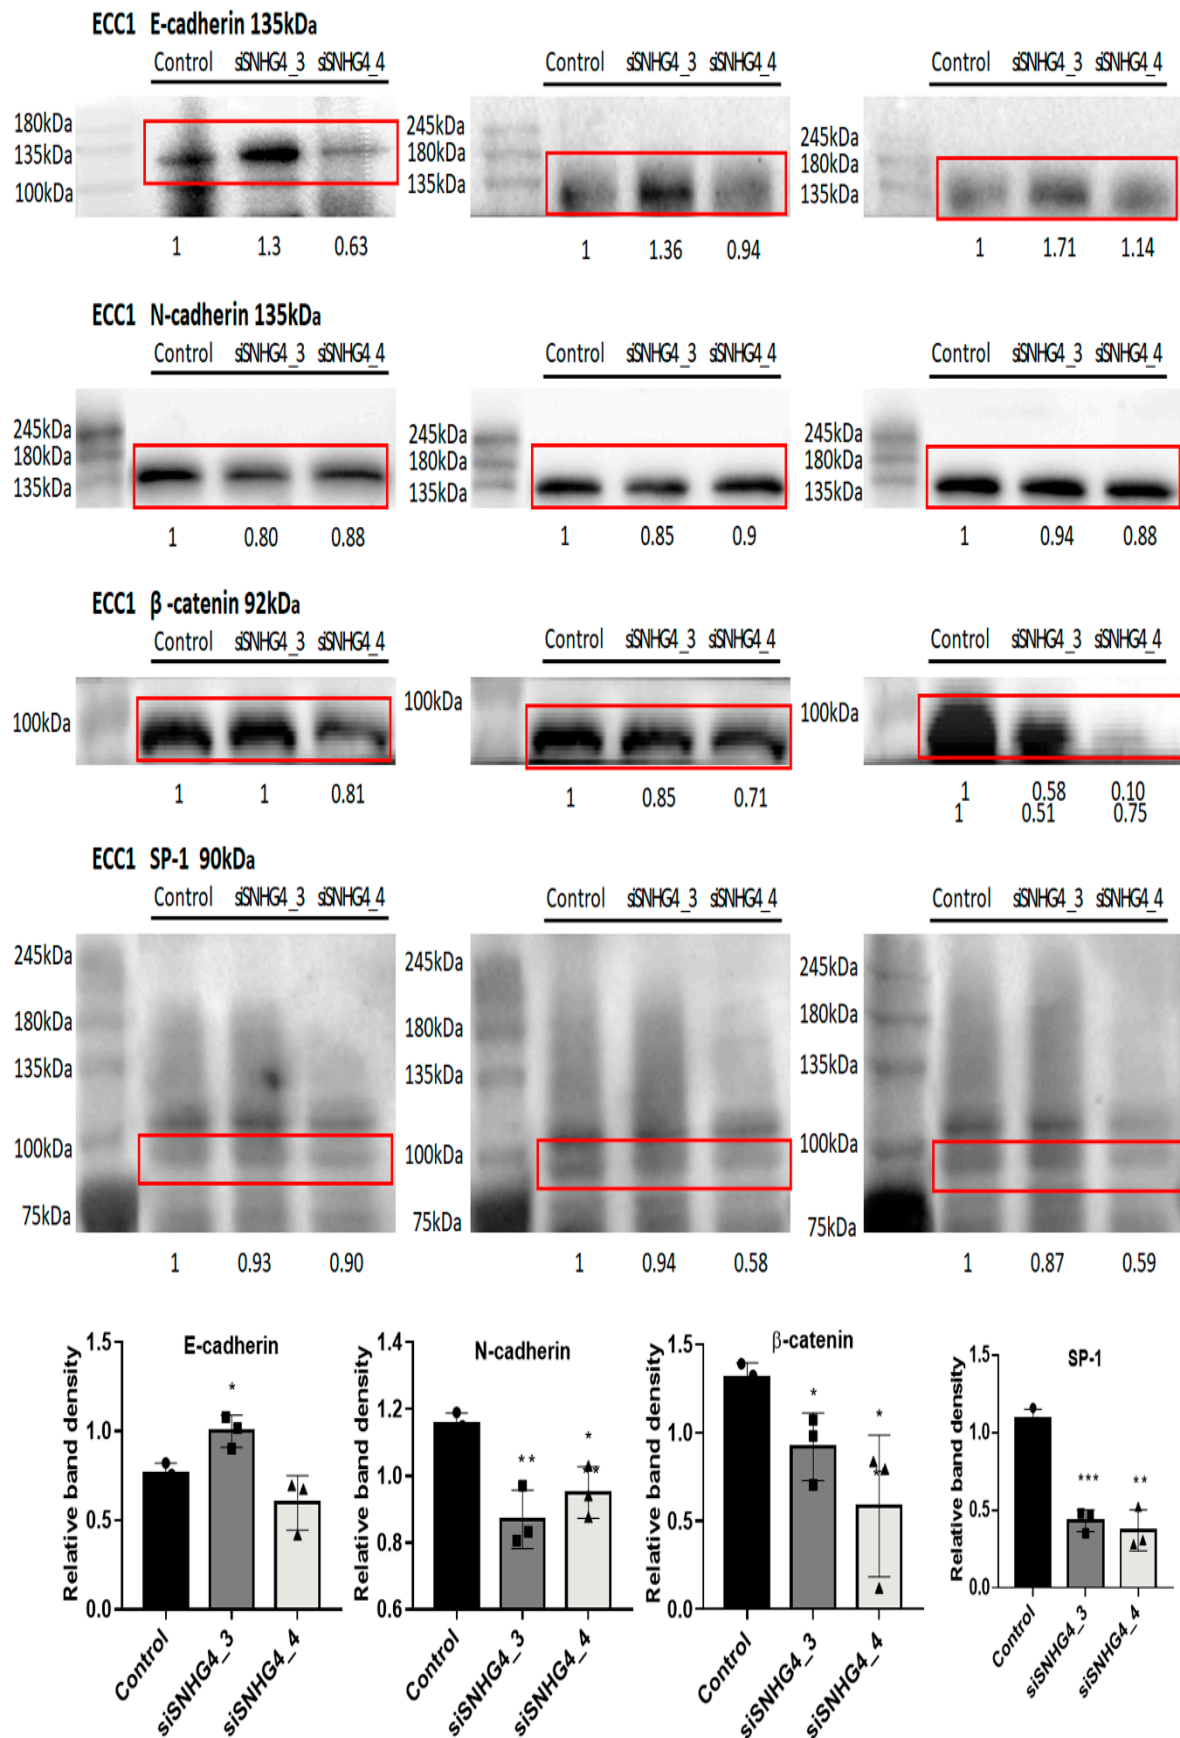

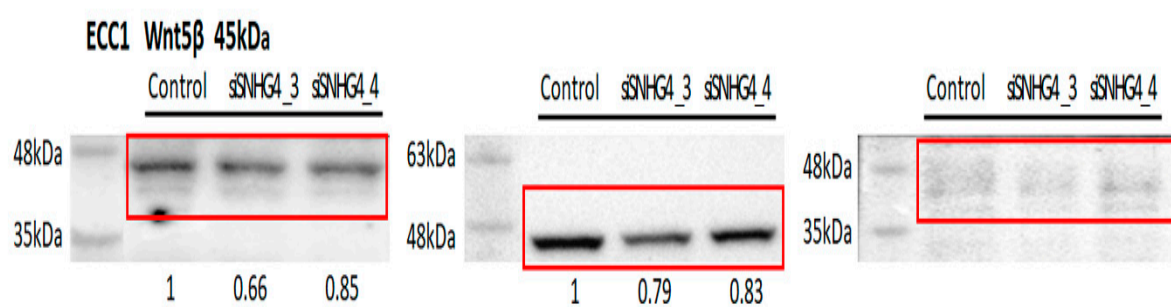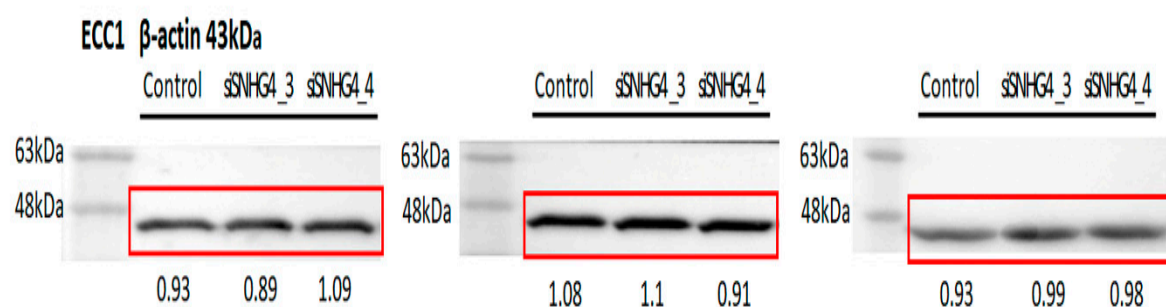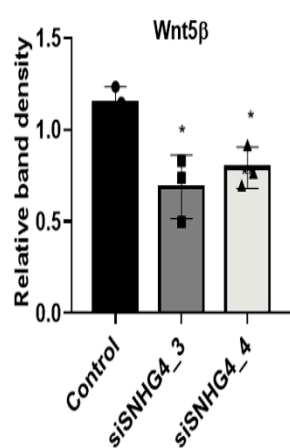

Figure S6. The whole Western blot for Figure 6.

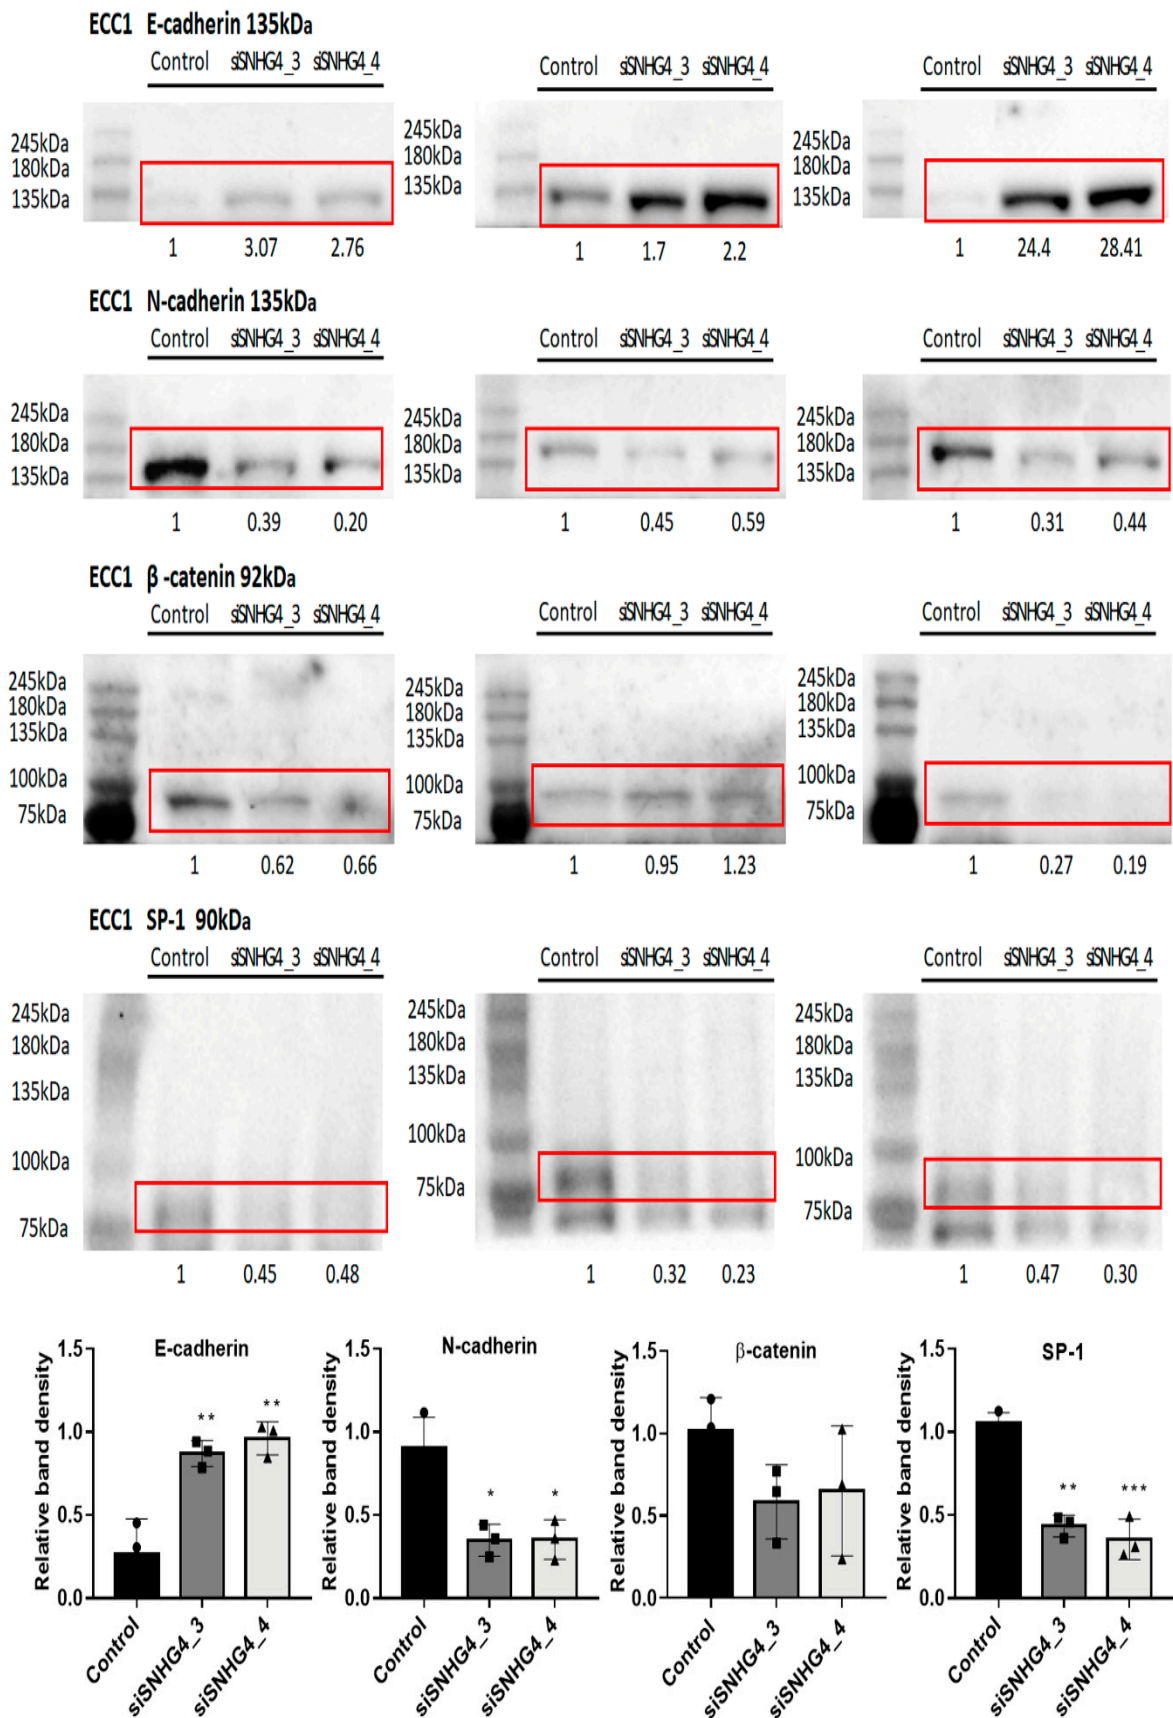

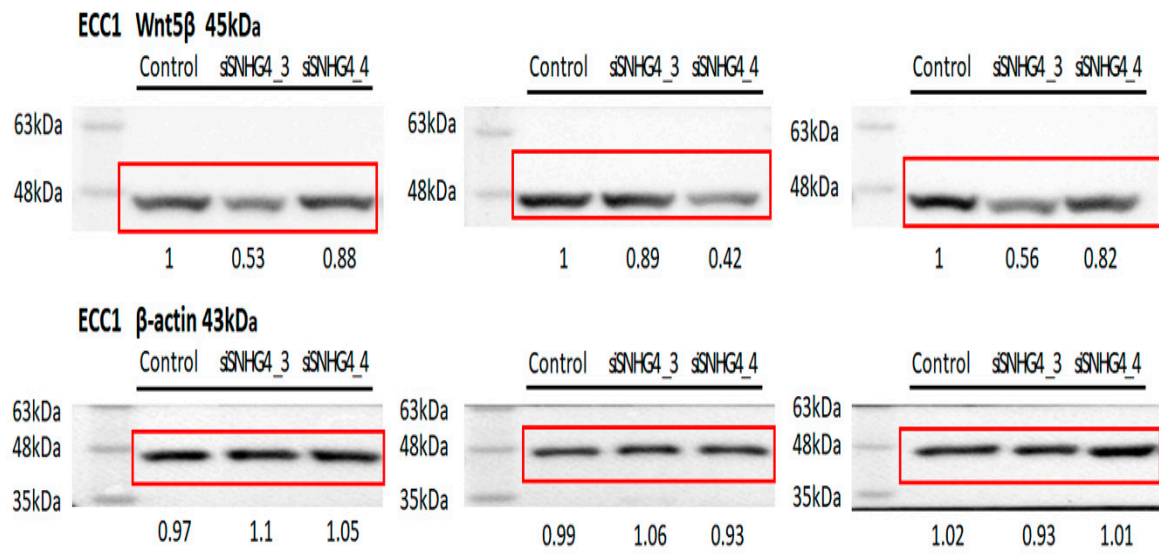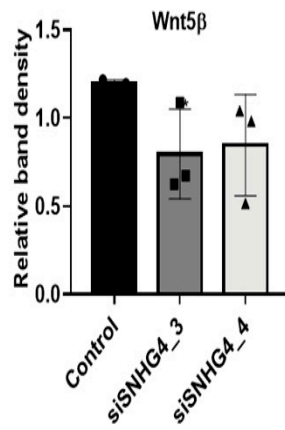

Supplement: s1 [file s1]
